# Supplementary material for: D-methionine alleviates cisplatin-induced mucositis by restoring the gut microbiota structure and improving intestinal inflammation
Source: PubMed Central journal article supplement — Ther Adv Med Oncol. 2019 Feb 12;11:1758835918821021. doi: 10.1177/1758835918821021 (PMC6376546; doi:10.1177/1758835918821021), 2019-02-12
Supplement: Supporting_Information_-2018.12.03.pdf [file Supporting_Information_-2018.12.03.pdf]

1 **Supplementary results**

2 Supplementary Table 1. Fecal moisture content, dry weight, fecal pH and stool  
3 appearance in experimental rats

|                            | Control    | D-methionine | Cisplatin | Cisplatin+D-methionine |
|----------------------------|------------|--------------|-----------|------------------------|
| Fresh fecal weight (g)     | 8.34       | 7.53         | 0.41      | 4.19                   |
| Dry fecal weight (g)       | 5.09       | 4.56         | 0.25      | 2.58                   |
| Fecal moisture content (%) | 39.0       | 39.5         | 39.7      | 38.4                   |
| Fecal pH                   | 7.0 ± 0.12 | 6.7 ± 0.0    | 6.7 ± 0.2 | 6.7 ± 0.2              |

4

5

6

7

8

9

10

11

12

13

14

15

16

17

18

19

20

21

22

23

24

1 (A)

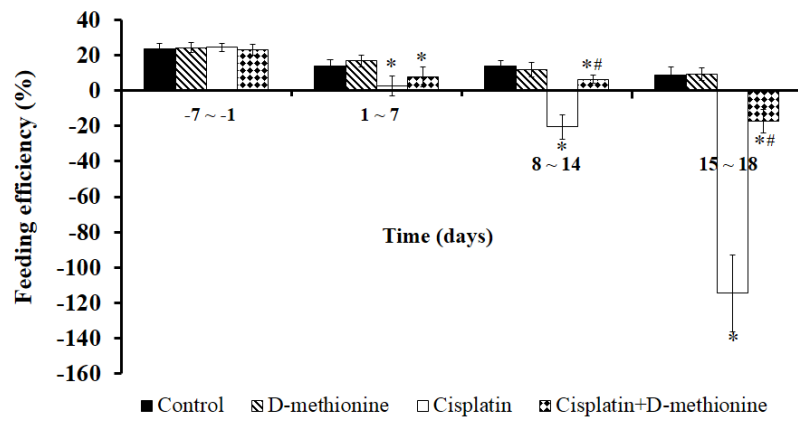

2

3 (B)

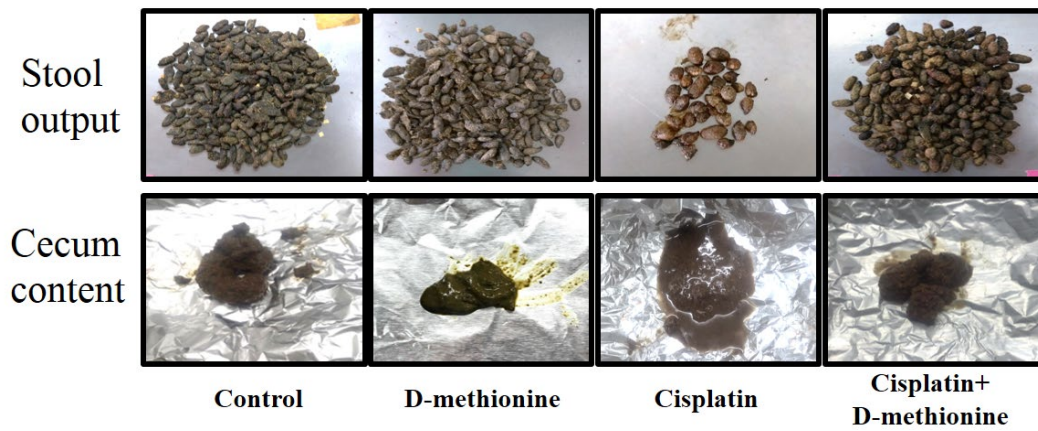

4

5 Supplementary Figure 1. (A) Feeding efficiencies during the experimental period. (B)

6 Stool and cecum content appearance in experimental rats. Data are presented as mean

7  $\pm$  SD, n=5-8. Differences were analyzed by one-way ANOVA.

8 The asterisks (\*) represent significant difference when compared with the control

9 group; whereas pound key (#) represent significant difference when compared with

10 the cisplatin group ( $p < 0.05$ ).

11

12

13

14

15

16

17

18

19

1 (A)

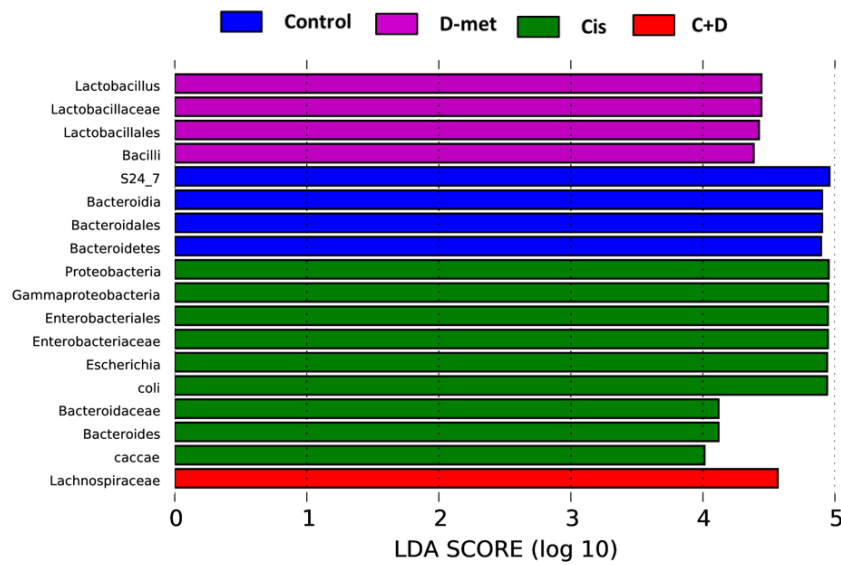

2

3

(B)

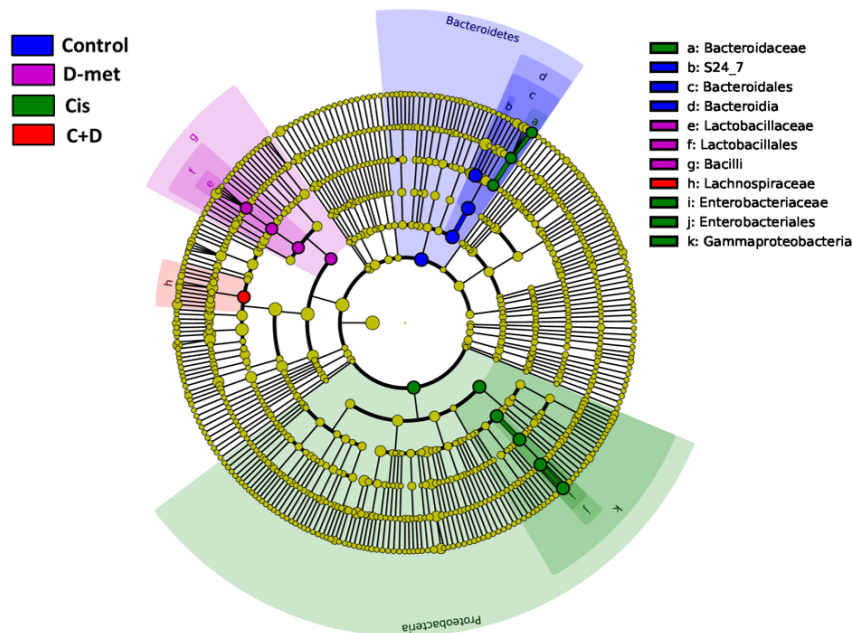

4

5 Supplementary Figure 2. (A) Linear discriminant analysis (LDA). An LDA score  
6 higher than 4 indicated the biomarker in the corresponding group has significant  
7 different among four groups. An LDA length (LDA score) indicated affect degree of  
8 significant species. The 18 taxa with the largest effect sizes (LDA Score >4) are  
9 presented.

10 (B) Cladogram (circular hierarchical tree), radial pattern of from inner to outer  
11 circular represent from phylum to genus (species) and each dot represents a bacterial

1 taxon at same level. The one innermost dot represent the highest level of taxonomy  
2 the kingdoms Bacteria, followed outwards by the lower levels, including phylum,  
3 class, order, family, genus and species. Each circle's diameter is proportional to the  
4 taxon's abundance. Each color represents different group. Blue indicates higher  
5 abundance in control animals, pink indicates higher abundance in D-methionine alone  
6 animals, green indicates higher abundance in cisplatin alone animals and yellow is  
7 higher abundance in cisplatin + D-methionine animals.

8

9

10

11

12

13

14

15

16

17

18

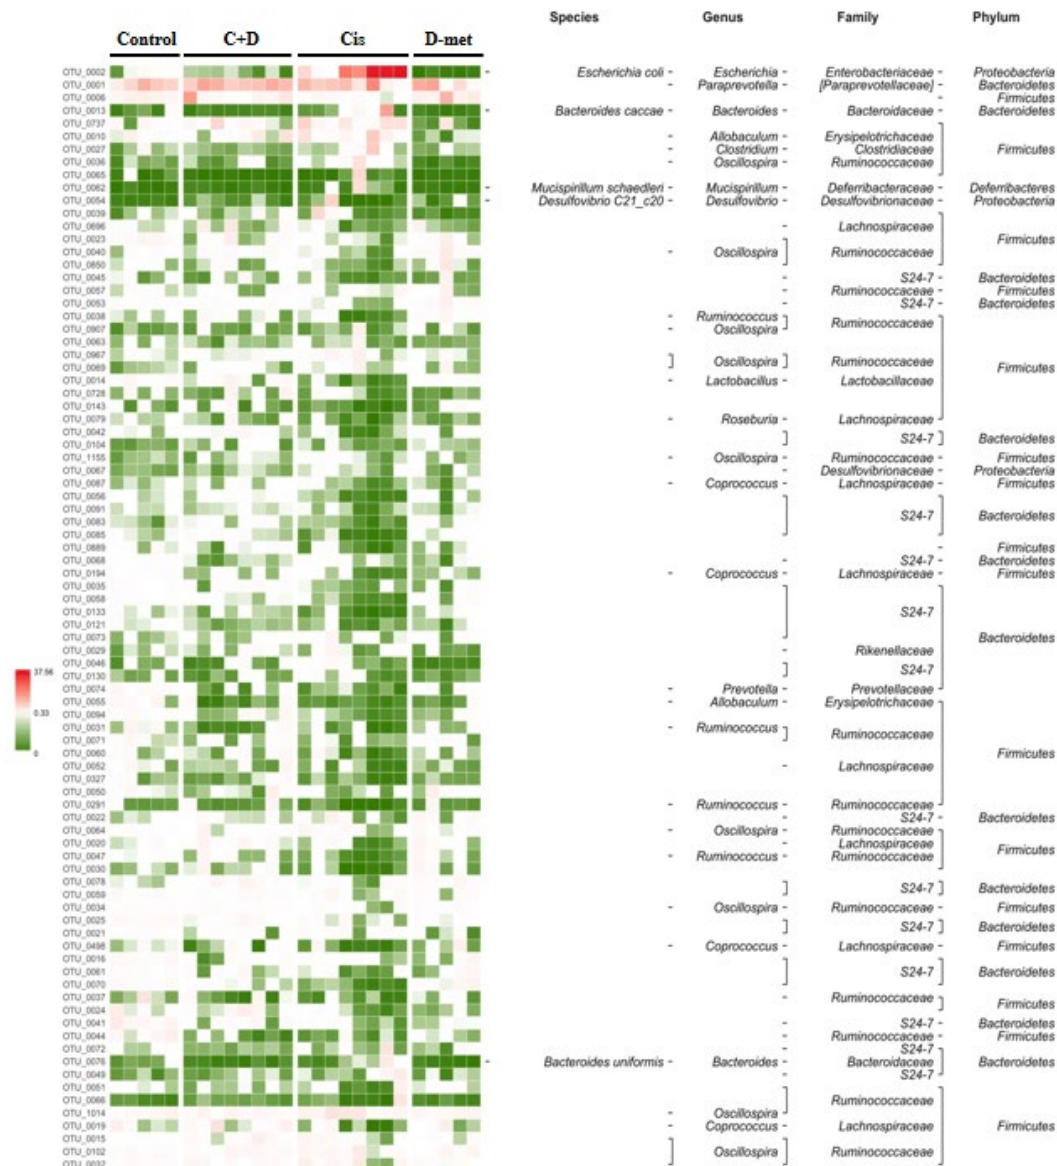

1  
2 Supplementary Figure 3. Distribution heatmap of microbial genera arranged by  
3 hierarchical clustering of rats with different treatments. The abundance distributions  
4 of the 100 most dominant operational taxonomic units (OTUs) of the four groups are  
5 displayed on species abundance heat map and represented by color gradient. On the  
6 right side are bacterial taxa (species, genus, family and phylum) from 100 OTUs.  
7 Whether the abundance of each sample is higher or lower is reflected on color  
8 gradient and by locations of species and levels. The heat map was performed by  
9 discrepancies of species-relative abundance between groups, with colors gradually

- 1 changed from deep red to deep green, in accordance with high relative abundance to
- 2 low. The deeper red is represented richer of bacteria. In contrast, deeper green is
- 3 represented fewer of bacteria.
- 4
